# Supplementary material for: Overexpression of HSPA1A enhances the osteogenic differentiation of bone marrow mesenchymal stem cells via activation of the Wnt/β-catenin signaling pathway
Source: PubMed Central journal article supplement (PMC4899801; doi:10.1038/srep27622), 2016-06-09

**Title:** Overexpression of *HSPA1A* enhances the osteogenic differentiation of bone marrow mesenchymal stem cells via activation of the Wnt/ $\beta$ -catenin signaling pathway

**Author names:** Wei Zhang, MD<sup>1\*</sup>, Deting Xue, MD<sup>1\*</sup>, Houfa Yin, MD<sup>2</sup>, Shengdong Wang, MD<sup>1</sup>, Chao Li, MD<sup>3</sup>, Erman Chen, MD<sup>1</sup>, Dongcai Hu, MD<sup>1</sup>, Yiqing Tao, MD<sup>1</sup>, Jiawei Yu, MD<sup>4</sup>, Qiang Zheng, MD<sup>1</sup>, Xiang Gao, MD<sup>1</sup>, Zhijun Pan, MD<sup>1#</sup>

**The affiliation and address of the authors:**

- 1- Department of Orthopedics, Second Affiliated Hospital, School of Medicine, Zhejiang University, 310009, Hangzhou, China.
- 2- Eye Center, Second Affiliated Hospital, School of Medicine, Zhejiang University, 310009, Hangzhou, China.
- 3- Department of Surgery, Second Affiliated Hospital of Zhejiang University School of Medicine, 310009, Hangzhou, Zhejiang Province, China.
- 4- Department of Orthopedics, Zhuji People's Hospital of Zhejiang Province, Zhuji, Zhejiang Province, China.

**#Corresponding author:**

Zhijun Pan, Tel: 0086-0571-87783567, E-mail: panzhijunzw@163.com

## Supplemental material legends

Supplemental material 1: Lentiviral overexpressing HSPA1A particles (Lenti-HSPA1A)

Supplemental material 2: Cell sheet preparation

Supplemental material 3: Animal model

## Supplemental material 1: lentiviral vector

### Vector Summary

|                             |                                                    |
|-----------------------------|----------------------------------------------------|
| Vector ID                   | VB150330-10009                                     |
| Vector Name (official)      | pLV[Exp]-Puro-CMV>rHspa1a[NM_031971.2];IRES:EGFP   |
| Date Created (Pacific Time) | 2015-03-30                                         |
| Size                        | 11145 bp                                           |
| Vector Type                 | Lentivirus gene expression vector (3rd generation) |
| Inserted Promoter           | CMV                                                |
| Inserted ORF                | rHspa1a[NM_031971.2], EGFP                         |
| Inserted Linker             | IRES                                               |
| Inserted Marker             | Puro                                               |
| Copy Number                 | High                                               |
| Bacterial Resistance        | Ampicillin                                         |
| Cloning Host                | Stbl3                                              |

### User Annotation of Vector

|                          |      |
|--------------------------|------|
| Vector alias (from user) | None |
| Comment (from user)      | None |

### Vector Map

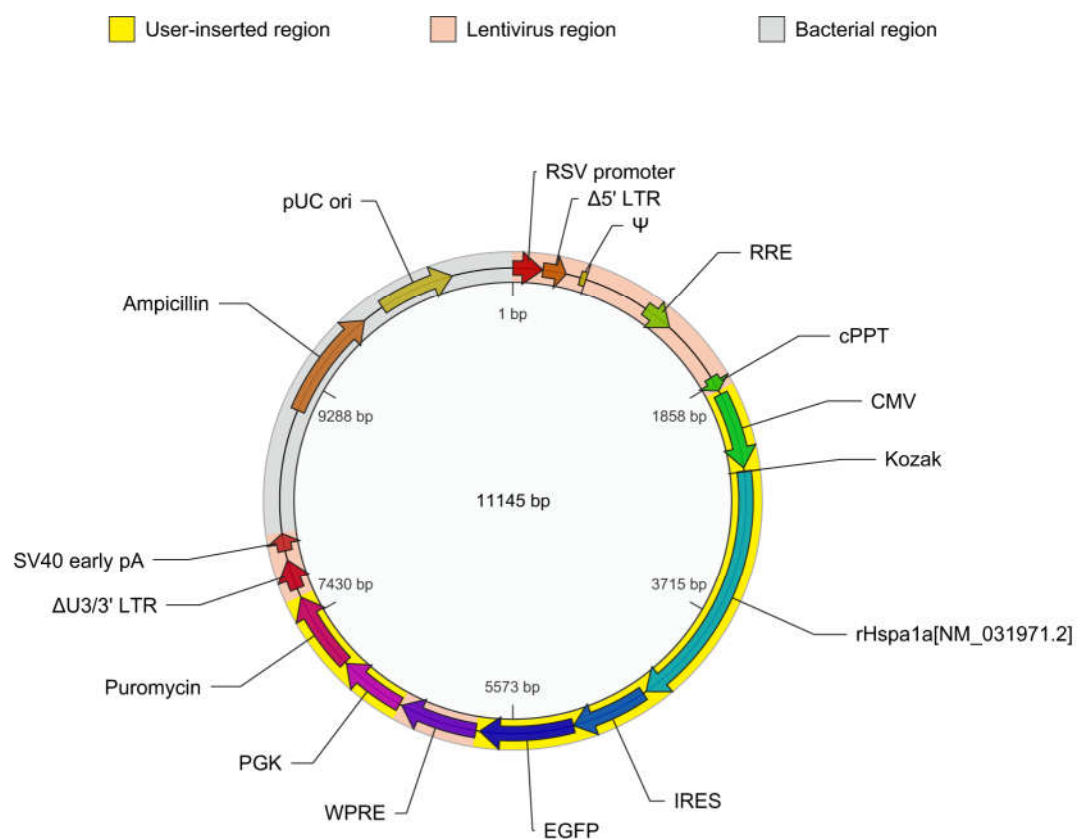

## Vector Components

| Component Name       | Nucleotide Position       | Full Name                                                        | Description                                                                                                                                                                                                      |
|----------------------|---------------------------|------------------------------------------------------------------|------------------------------------------------------------------------------------------------------------------------------------------------------------------------------------------------------------------|
| RSV promoter         | <b>1-229</b>              | Rous sarcoma virus (RSV) enhancer/promoter                       | Allows Tat-independent production of viral mRNA.                                                                                                                                                                 |
| $\Delta$ 5' LTR      | <a href="#">230-410</a>   | HIV-1 truncated 5' LTR                                           | Permits viral packaging and reverse transcription of the viral mRNA.                                                                                                                                             |
| $\Psi$               | <b>521-565</b>            | HIV-1 psi packaging signal                                       | Allows viral packaging.                                                                                                                                                                                          |
| RRE                  | <a href="#">1075-1308</a> | HIV-1 Rev response element                                       | Permits Rev-dependent nuclear export of unspliced viral mRNA.                                                                                                                                                    |
| cPPT                 | <b>1803-1920</b>          | Central polypurine tract                                         | Facilitates the nuclear import of HIV-1 cDNA through a central DNA flap.                                                                                                                                         |
| CMV                  | <a href="#">1950-2538</a> | CMV                                                              | Component entered by user                                                                                                                                                                                        |
| Kozak                | <a href="#">2563-2568</a> | Kozak                                                            | Component entered by user                                                                                                                                                                                        |
| rHspa1a[NM_031971.2] | <a href="#">2569-4494</a> | rHspa1a[NM_031971.2]                                             | Component entered by user                                                                                                                                                                                        |
| IRES                 | <a href="#">4519-5106</a> | IRES                                                             | Component entered by user                                                                                                                                                                                        |
| EGFP                 | <a href="#">5107-5826</a> | EGFP                                                             | Component entered by user                                                                                                                                                                                        |
| WPRES                | <b>5856-6453</b>          | Woodchuck hepatitis virus posttranscriptional regulatory element | Facilitates effective transcription termination at the 3' LTR.                                                                                                                                                   |
| PGK                  | <a href="#">6472-6982</a> | Mouse phosphoglycerate kinase promoter                           | Allows high-level expression of the selection marker in mammalian cell lines.                                                                                                                                    |
| Puromycin            | <b>6995-7594</b>          | Puromycin resistance gene                                        | Permits selection of stably transduced mammalian cell lines.                                                                                                                                                     |
| $\Delta$ U3/3' LTR   | <a href="#">7666-7900</a> | HIV-1 truncated 3' LTR                                           | Allows viral packaging but self-inactivates the 5' LTR for biosafety purposes. The element also contains a polyadenylation signal for transcription termination and polyadenylation of mRNA in transduced cells. |
| SV40 early pA        | <b>7972-8106</b>          | SV40 early polyadenation signal                                  | Allows transcription termination and polyadenylation of mRNA.                                                                                                                                                    |
| Ampicillin           | <a href="#">9061-9921</a> | Ampicillin resistance gene                                       | Allows selection of the plasmid in E.coli.                                                                                                                                                                       |
| pUC ori              | <b>10091-10679</b>        | pUC origin of replication                                        | Permits high-copy replication and maintenance in E.coli.                                                                                                                                                         |

Note: (c) denotes complementary strand.

## User Annotation of Vector Components

| Component Name       | Comment by User |
|----------------------|-----------------|
| CMV                  | <i>None</i>     |
| rHspa1a[NM_031971.2] | <i>None</i>     |
| IRES                 | <i>None</i>     |
| EGFP                 | <i>None</i>     |
| Puro                 | <i>None</i>     |

## Supplemental material 2: Cell sheet preparation

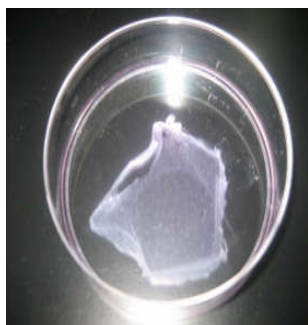

## Supplemental material 3: Animal model

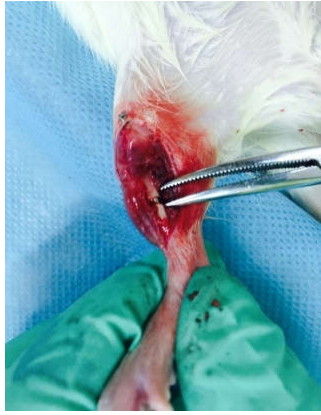

Supplement: srep27622-s1.pdf [file srep27622-s1.pdf]
